# Supplementary material for: Estimation of pre-industrial nitrous oxide emissions from the land biosphere
Source: Copernicus journal article supplement (doi:10.5194/cp-2016-103), 2016-10-24
Supplement: Supplementary file [file cp-2016-103-AC3-supplement.pdf]

Table S1. The description of field measurements from natural vegetation in different sites.

| Number | PFT                  | location    |          | Year      | References                     |
|--------|----------------------|-------------|----------|-----------|--------------------------------|
|        |                      | Longitude   | Latitude |           |                                |
| 1      | Forest: Spruce       | 11°25'E     | 48°46'N  | 1993-1995 | Butterbach-Bahl et al., 1998   |
| 2      | Forest: Spruce       | 09°34'E     | 51°46'N  | 2007-2008 | Eickenscheidt and Brumme, 2012 |
| 3      | Forest: Liana canopy | 55°31'W     | 3°59'S   | 1998-2000 | Davidson et al., 2004          |
| 4      | Forest: Douglas-fir  | 124°30'W    | 44°00'N  | 2007-2008 | Erickson and Perakis, 2014     |
| 5      | Grassland            | 09°42'E     | 51°46'N  | 2008-2009 | Hoefl et al., 2012             |
| 6      | Forest               | 156°14'W    | 20°48'N  | 2000-2001 | Holtgrieve et al., 2006        |
| 7      | Forest: Spruce & Oak | 19°57'–58'E | 47°53'N  | 2002-2003 | Horváth et al., 2006           |
| 8      | Forest: Beech        | 16°15'E     | 48°14'N  | 2002-2004 | Kitzler et al., 2006           |
| 9      | Grassland            | 104°42'W    | 40°50'N  | 1997-2000 | Mosier et al., 2002            |
| 10     | Tropical rain forest | 145°30'E    | 17°30'S  | 1997-1999 | Breuer et al., 2000            |
| 11     | Tropical rain forest | 63°00'W     | 10°00'S  | –         | Stehfest and Bouwman, 2006     |
| 12     | Savanna              | 28°30'E     | 24°30'S  | 1994      | Scholes et al., 1997           |
| 13     | Tropical forest      | 47°30'W     | 3°00'S   | 1987      | Luizão et al., 1989            |
| 14     | Tropical forest      | 115°30'E    | 2°00'S   | 1998-1999 | Hadi et al., 2000              |
| 15     | Tropical forest      | 84°00'W     | 10°26'N  | 1990-1991 | Keller and Reiners, 1994       |
| 16     | Subtropical forest   | 66°00'W     | 18°00'N  | 1995-1996 | Erickson et al. 2001           |
| 17     | Temperate forest     | 116°30'E    | 39°30'N  | 1997-1998 | Sun and Xu, 2001               |
| 18     | Temperate forest     | 89°00'W     | 43°00'N  | 1979-1981 | Goodroad and Keeney, 1984      |
| 19     | Grassland            | 116°04'E    | 43°26'N  | 1995      | Chen et al., 2000              |
| 20     | Temperate forest     | 126°55'E    | 41°23'N  | 1994-1995 |                                |

Table S2. All results of the global-, continental-, and biome-level N<sub>2</sub>O emission from 100 sets of DLEM simulations in 1860. The unit is Tg N yr<sup>-1</sup>.

| No. | Total | Europe | North America | South America | Southern Asia | Northern Asia | Oceania | Africa | Boreal Forest | Tropical Forest | Temperate Forest | Shrubland | Grassland | Cropland | Tundra |
|-----|-------|--------|---------------|---------------|---------------|---------------|---------|--------|---------------|-----------------|------------------|-----------|-----------|----------|--------|
| 1   | 6.986 | 0.339  | 0.774         | 2.323         | 1.315         | 0.175         | 0.348   | 1.645  | 0.695         | 4.467           | 0.695            | 0.925     | 0.225     | 0.479    | 0.010  |
| 2   | 6.546 | 0.292  | 0.684         | 2.244         | 1.225         | 0.166         | 0.325   | 1.545  | 0.594         | 4.281           | 0.594            | 0.845     | 0.199     | 0.428    | 0.013  |
| 3   | 5.121 | 0.243  | 0.554         | 1.724         | 0.959         | 0.124         | 0.254   | 1.213  | 0.504         | 3.309           | 0.504            | 0.672     | 0.159     | 0.341    | 0.005  |
| 4   | 6.699 | 0.350  | 0.772         | 2.167         | 1.248         | 0.179         | 0.339   | 1.578  | 0.734         | 4.180           | 0.734            | 0.926     | 0.219     | 0.443    | 0.012  |
| 5   | 5.386 | 0.257  | 0.585         | 1.807         | 1.004         | 0.137         | 0.268   | 1.275  | 0.536         | 3.466           | 0.536            | 0.715     | 0.165     | 0.347    | 0.009  |
| 6   | 6.178 | 0.317  | 0.701         | 2.016         | 1.152         | 0.163         | 0.312   | 1.458  | 0.661         | 3.882           | 0.661            | 0.846     | 0.199     | 0.408    | 0.011  |
| 7   | 6.029 | 0.268  | 0.627         | 2.073         | 1.129         | 0.150         | 0.298   | 1.424  | 0.545         | 3.953           | 0.545            | 0.775     | 0.182     | 0.396    | 0.010  |
| 8   | 6.966 | 0.303  | 0.720         | 2.405         | 1.306         | 0.176         | 0.346   | 1.643  | 0.612         | 4.583           | 0.612            | 0.892     | 0.211     | 0.455    | 0.014  |
| 9   | 6.033 | 0.289  | 0.659         | 2.019         | 1.132         | 0.150         | 0.300   | 1.426  | 0.595         | 3.878           | 0.595            | 0.796     | 0.190     | 0.406    | 0.008  |
| 10  | 5.666 | 0.259  | 0.602         | 1.932         | 1.067         | 0.134         | 0.278   | 1.338  | 0.530         | 3.703           | 0.530            | 0.728     | 0.175     | 0.381    | 0.005  |
| 11  | 5.796 | 0.267  | 0.616         | 1.970         | 1.088         | 0.142         | 0.287   | 1.369  | 0.545         | 3.770           | 0.545            | 0.751     | 0.179     | 0.389    | 0.008  |
| 12  | 4.945 | 0.218  | 0.508         | 1.713         | 0.929         | 0.117         | 0.244   | 1.167  | 0.442         | 3.258           | 0.442            | 0.628     | 0.149     | 0.333    | 0.006  |
| 13  | 7.677 | 0.376  | 0.855         | 2.536         | 1.437         | 0.205         | 0.386   | 1.806  | 0.773         | 4.873           | 0.773            | 1.033     | 0.246     | 0.511    | 0.017  |
| 14  | 5.347 | 0.236  | 0.551         | 1.851         | 1.003         | 0.129         | 0.264   | 1.263  | 0.478         | 3.523           | 0.478            | 0.681     | 0.161     | 0.355    | 0.007  |
| 15  | 6.257 | 0.321  | 0.709         | 2.041         | 1.167         | 0.168         | 0.317   | 1.474  | 0.667         | 3.924           | 0.667            | 0.859     | 0.201     | 0.416    | 0.013  |
| 16  | 7.443 | 0.335  | 0.787         | 2.540         | 1.414         | 0.181         | 0.371   | 1.742  | 0.666         | 4.847           | 0.666            | 0.955     | 0.237     | 0.528    | 0.011  |
| 17  | 6.384 | 0.287  | 0.670         | 2.184         | 1.188         | 0.167         | 0.318   | 1.509  | 0.590         | 4.164           | 0.590            | 0.833     | 0.192     | 0.404    | 0.014  |
| 18  | 6.019 | 0.303  | 0.675         | 1.979         | 1.123         | 0.158         | 0.303   | 1.421  | 0.629         | 3.803           | 0.629            | 0.818     | 0.192     | 0.400    | 0.011  |
| 19  | 5.520 | 0.251  | 0.587         | 1.886         | 1.042         | 0.127         | 0.269   | 1.304  | 0.514         | 3.615           | 0.514            | 0.706     | 0.171     | 0.376    | 0.003  |
| 20  | 6.455 | 0.291  | 0.673         | 2.205         | 1.206         | 0.170         | 0.324   | 1.523  | 0.589         | 4.197           | 0.589            | 0.842     | 0.196     | 0.422    | 0.016  |
| 21  | 6.145 | 0.253  | 0.580         | 2.090         | 1.170         | 0.128         | 0.278   | 1.583  | 0.480         | 4.105           | 0.480            | 0.805     | 0.185     | 0.443    | 0.015  |
| 22  | 6.886 | 0.343  | 0.770         | 2.266         | 1.287         | 0.183         | 0.347   | 1.623  | 0.708         | 4.354           | 0.708            | 0.933     | 0.221     | 0.459    | 0.014  |
| 23  | 6.927 | 0.300  | 0.714         | 2.395         | 1.313         | 0.166         | 0.344   | 1.627  | 0.596         | 4.563           | 0.596            | 0.876     | 0.214     | 0.480    | 0.010  |
| 24  | 7.927 | 0.381  | 0.866         | 2.635         | 1.482         | 0.221         | 0.403   | 1.862  | 0.774         | 5.038           | 0.774            | 1.067     | 0.251     | 0.524    | 0.024  |
| 25  | 8.045 | 0.388  | 0.885         | 2.669         | 1.501         | 0.224         | 0.407   | 1.892  | 0.795         | 5.117           | 0.795            | 1.085     | 0.253     | 0.521    | 0.023  |
| 26  | 4.766 | 0.219  | 0.507         | 1.627         | 0.898         | 0.108         | 0.233   | 1.129  | 0.451         | 3.120           | 0.451            | 0.610     | 0.147     | 0.323    | 0.002  |
| 27  | 5.459 | 0.253  | 0.578         | 1.856         | 1.025         | 0.134         | 0.271   | 1.288  | 0.514         | 3.547           | 0.514            | 0.708     | 0.168     | 0.369    | 0.007  |
| 28  | 5.181 | 0.252  | 0.567         | 1.730         | 0.964         | 0.134         | 0.260   | 1.226  | 0.526         | 3.314           | 0.526            | 0.696     | 0.160     | 0.334    | 0.008  |

| No. | Total | Europe | North America | South America | Southern Asia | Northern Asia | Oceania | Africa | Boreal Forest | Tropical Forest | Temperate Forest | Shrubland | Grassland | Cropland | Tundra |
|-----|-------|--------|---------------|---------------|---------------|---------------|---------|--------|---------------|-----------------|------------------|-----------|-----------|----------|--------|
| 29  | 6.774 | 0.314  | 0.724         | 2.290         | 1.267         | 0.176         | 0.339   | 1.597  | 0.642         | 4.373           | 0.642            | 0.891     | 0.210     | 0.447    | 0.015  |
| 30  | 6.805 | 0.325  | 0.741         | 2.275         | 1.268         | 0.184         | 0.341   | 1.605  | 0.671         | 4.357           | 0.671            | 0.911     | 0.211     | 0.436    | 0.016  |
| 31  | 6.258 | 0.260  | 0.603         | 2.121         | 1.204         | 0.125         | 0.282   | 1.598  | 0.494         | 4.168           | 0.494            | 0.822     | 0.191     | 0.465    | 0.012  |
| 32  | 7.660 | 0.370  | 0.839         | 2.543         | 1.438         | 0.205         | 0.388   | 1.802  | 0.749         | 4.877           | 0.749            | 1.024     | 0.245     | 0.517    | 0.019  |
| 33  | 6.276 | 0.319  | 0.711         | 2.054         | 1.167         | 0.167         | 0.316   | 1.481  | 0.670         | 3.955           | 0.670            | 0.860     | 0.199     | 0.404    | 0.012  |
| 34  | 6.591 | 0.294  | 0.691         | 2.261         | 1.242         | 0.160         | 0.326   | 1.551  | 0.595         | 4.315           | 0.595            | 0.845     | 0.204     | 0.447    | 0.010  |
| 35  | 5.087 | 0.224  | 0.525         | 1.763         | 0.963         | 0.115         | 0.249   | 1.198  | 0.451         | 3.360           | 0.451            | 0.639     | 0.156     | 0.354    | 0.003  |
| 36  | 8.133 | 0.381  | 0.878         | 2.728         | 1.521         | 0.222         | 0.411   | 1.911  | 0.772         | 5.213           | 0.772            | 1.081     | 0.255     | 0.536    | 0.024  |
| 37  | 6.066 | 0.293  | 0.665         | 2.026         | 1.144         | 0.147         | 0.301   | 1.431  | 0.597         | 3.895           | 0.597            | 0.796     | 0.194     | 0.421    | 0.007  |
| 38  | 4.979 | 0.243  | 0.545         | 1.660         | 0.930         | 0.125         | 0.249   | 1.178  | 0.505         | 3.185           | 0.505            | 0.664     | 0.155     | 0.331    | 0.007  |
| 39  | 5.230 | 0.249  | 0.569         | 1.760         | 0.980         | 0.124         | 0.257   | 1.240  | 0.519         | 3.386           | 0.519            | 0.685     | 0.163     | 0.345    | 0.004  |
| 40  | 6.075 | 0.275  | 0.641         | 2.076         | 1.135         | 0.153         | 0.301   | 1.435  | 0.566         | 3.964           | 0.566            | 0.788     | 0.185     | 0.394    | 0.010  |
| 41  | 6.822 | 0.266  | 0.681         | 2.228         | 1.223         | 0.264         | 0.519   | 1.577  | 0.550         | 4.225           | 0.550            | 1.074     | 0.233     | 0.440    | 0.050  |
| 42  | 5.872 | 0.242  | 0.582         | 2.075         | 1.113         | 0.135         | 0.288   | 1.380  | 0.477         | 3.931           | 0.477            | 0.724     | 0.176     | 0.407    | 0.006  |
| 43  | 6.743 | 0.298  | 0.702         | 2.317         | 1.261         | 0.172         | 0.335   | 1.592  | 0.607         | 4.416           | 0.607            | 0.870     | 0.204     | 0.438    | 0.014  |
| 44  | 7.161 | 0.380  | 0.832         | 2.300         | 1.338         | 0.195         | 0.365   | 1.682  | 0.788         | 4.435           | 0.788            | 0.996     | 0.237     | 0.483    | 0.016  |
| 45  | 5.090 | 0.224  | 0.525         | 1.764         | 0.954         | 0.121         | 0.250   | 1.203  | 0.457         | 3.358           | 0.457            | 0.647     | 0.153     | 0.337    | 0.006  |
| 46  | 5.912 | 0.253  | 0.596         | 2.061         | 1.108         | 0.147         | 0.294   | 1.395  | 0.506         | 3.908           | 0.506            | 0.749     | 0.176     | 0.393    | 0.011  |
| 47  | 6.370 | 0.332  | 0.731         | 2.066         | 1.191         | 0.165         | 0.321   | 1.502  | 0.692         | 3.987           | 0.692            | 0.873     | 0.209     | 0.428    | 0.010  |
| 48  | 5.153 | 0.214  | 0.513         | 1.821         | 0.967         | 0.120         | 0.252   | 1.216  | 0.432         | 3.452           | 0.432            | 0.640     | 0.151     | 0.339    | 0.006  |
| 49  | 6.057 | 0.290  | 0.665         | 2.030         | 1.138         | 0.146         | 0.298   | 1.431  | 0.600         | 3.906           | 0.600            | 0.795     | 0.192     | 0.407    | 0.006  |
| 50  | 4.905 | 0.217  | 0.507         | 1.699         | 0.922         | 0.114         | 0.241   | 1.158  | 0.441         | 3.236           | 0.441            | 0.621     | 0.148     | 0.331    | 0.004  |
| 51  | 4.862 | 0.227  | 0.521         | 1.650         | 0.912         | 0.115         | 0.239   | 1.153  | 0.470         | 3.165           | 0.470            | 0.631     | 0.149     | 0.322    | 0.004  |
| 52  | 7.706 | 0.355  | 0.825         | 2.603         | 1.441         | 0.206         | 0.387   | 1.814  | 0.724         | 4.972           | 0.724            | 1.016     | 0.239     | 0.504    | 0.020  |
| 53  | 6.758 | 0.306  | 0.708         | 2.304         | 1.266         | 0.176         | 0.339   | 1.593  | 0.617         | 4.390           | 0.617            | 0.881     | 0.207     | 0.448    | 0.016  |
| 54  | 5.321 | 0.248  | 0.565         | 1.806         | 0.993         | 0.136         | 0.266   | 1.255  | 0.508         | 3.443           | 0.508            | 0.699     | 0.162     | 0.349    | 0.009  |
| 55  | 5.758 | 0.281  | 0.635         | 1.914         | 1.076         | 0.146         | 0.288   | 1.362  | 0.584         | 3.678           | 0.584            | 0.769     | 0.181     | 0.382    | 0.008  |
| 56  | 5.814 | 0.247  | 0.586         | 2.033         | 1.078         | 0.150         | 0.288   | 1.375  | 0.503         | 3.850           | 0.503            | 0.742     | 0.169     | 0.362    | 0.014  |

| No. | Total | Europe | North America | South America | Southern Asia | Northern Asia | Oceania | Africa | Boreal Forest | Tropical Forest | Temperate Forest | Shrubland | Grassland | Cropland | Tundra |
|-----|-------|--------|---------------|---------------|---------------|---------------|---------|--------|---------------|-----------------|------------------|-----------|-----------|----------|--------|
| 57  | 7.764 | 0.400  | 0.887         | 2.516         | 1.452         | 0.215         | 0.396   | 1.822  | 0.823         | 4.840           | 0.823            | 1.070     | 0.254     | 0.523    | 0.020  |
| 58  | 5.386 | 0.230  | 0.545         | 1.884         | 1.019         | 0.124         | 0.265   | 1.268  | 0.459         | 3.581           | 0.459            | 0.672     | 0.162     | 0.370    | 0.005  |
| 59  | 5.222 | 0.232  | 0.543         | 1.801         | 0.970         | 0.131         | 0.259   | 1.236  | 0.482         | 3.427           | 0.482            | 0.676     | 0.154     | 0.328    | 0.009  |
| 60  | 6.341 | 0.290  | 0.667         | 2.159         | 1.182         | 0.168         | 0.318   | 1.495  | 0.589         | 4.110           | 0.589            | 0.832     | 0.192     | 0.411    | 0.016  |
| 61  | 7.150 | 0.326  | 0.761         | 2.430         | 1.354         | 0.175         | 0.356   | 1.678  | 0.653         | 4.645           | 0.653            | 0.922     | 0.227     | 0.500    | 0.011  |
| 62  | 5.007 | 0.229  | 0.531         | 1.709         | 0.947         | 0.113         | 0.245   | 1.183  | 0.469         | 3.275           | 0.469            | 0.639     | 0.156     | 0.348    | 0.002  |
| 63  | 5.877 | 0.259  | 0.610         | 2.030         | 1.112         | 0.138         | 0.289   | 1.383  | 0.521         | 3.869           | 0.521            | 0.744     | 0.181     | 0.406    | 0.006  |
| 64  | 5.175 | 0.231  | 0.539         | 1.786         | 0.976         | 0.119         | 0.254   | 1.220  | 0.468         | 3.409           | 0.468            | 0.655     | 0.158     | 0.353    | 0.004  |
| 65  | 6.739 | 0.324  | 0.740         | 2.244         | 1.255         | 0.179         | 0.338   | 1.591  | 0.674         | 4.307           | 0.674            | 0.905     | 0.210     | 0.433    | 0.014  |
| 66  | 5.383 | 0.253  | 0.577         | 1.819         | 1.006         | 0.134         | 0.268   | 1.273  | 0.521         | 3.483           | 0.521            | 0.706     | 0.165     | 0.353    | 0.008  |
| 67  | 6.911 | 0.344  | 0.772         | 2.276         | 1.296         | 0.181         | 0.347   | 1.628  | 0.705         | 4.376           | 0.705            | 0.930     | 0.223     | 0.469    | 0.013  |
| 68  | 5.503 | 0.219  | 0.536         | 1.967         | 1.031         | 0.128         | 0.268   | 1.299  | 0.440         | 3.719           | 0.440            | 0.675     | 0.158     | 0.357    | 0.007  |
| 69  | 6.429 | 0.297  | 0.684         | 2.181         | 1.201         | 0.166         | 0.321   | 1.516  | 0.606         | 4.164           | 0.606            | 0.843     | 0.197     | 0.420    | 0.013  |
| 70  | 7.045 | 0.333  | 0.766         | 2.361         | 1.326         | 0.179         | 0.351   | 1.660  | 0.678         | 4.531           | 0.678            | 0.927     | 0.223     | 0.479    | 0.012  |
| 71  | 6.688 | 0.309  | 0.720         | 2.263         | 1.268         | 0.159         | 0.330   | 1.573  | 0.626         | 4.338           | 0.626            | 0.864     | 0.214     | 0.470    | 0.007  |
| 72  | 5.739 | 0.280  | 0.633         | 1.911         | 1.077         | 0.141         | 0.285   | 1.357  | 0.579         | 3.675           | 0.579            | 0.760     | 0.183     | 0.390    | 0.006  |
| 73  | 4.956 | 0.232  | 0.529         | 1.679         | 0.925         | 0.123         | 0.247   | 1.172  | 0.480         | 3.207           | 0.480            | 0.651     | 0.152     | 0.326    | 0.007  |
| 74  | 5.216 | 0.252  | 0.566         | 1.746         | 0.974         | 0.134         | 0.261   | 1.233  | 0.519         | 3.342           | 0.519            | 0.695     | 0.161     | 0.345    | 0.009  |
| 75  | 5.450 | 0.258  | 0.592         | 1.838         | 1.031         | 0.125         | 0.267   | 1.287  | 0.529         | 3.534           | 0.529            | 0.704     | 0.173     | 0.379    | 0.002  |
| 76  | 5.734 | 0.238  | 0.570         | 2.021         | 1.069         | 0.141         | 0.282   | 1.357  | 0.481         | 3.828           | 0.481            | 0.720     | 0.167     | 0.367    | 0.010  |
| 77  | 5.783 | 0.273  | 0.621         | 1.948         | 1.086         | 0.144         | 0.289   | 1.366  | 0.557         | 3.731           | 0.557            | 0.759     | 0.180     | 0.391    | 0.009  |
| 78  | 5.469 | 0.223  | 0.541         | 1.938         | 1.027         | 0.127         | 0.267   | 1.291  | 0.450         | 3.673           | 0.450            | 0.676     | 0.160     | 0.360    | 0.007  |
| 79  | 7.412 | 0.352  | 0.802         | 2.480         | 1.387         | 0.200         | 0.374   | 1.744  | 0.714         | 4.743           | 0.714            | 0.987     | 0.233     | 0.491    | 0.020  |
| 80  | 5.884 | 0.281  | 0.641         | 1.972         | 1.107         | 0.144         | 0.292   | 1.390  | 0.576         | 3.789           | 0.576            | 0.772     | 0.186     | 0.402    | 0.007  |
| 81  | 5.102 | 0.218  | 0.519         | 1.786         | 0.961         | 0.116         | 0.249   | 1.203  | 0.442         | 3.398           | 0.442            | 0.637     | 0.152     | 0.342    | 0.003  |
| 82  | 6.319 | 0.291  | 0.673         | 2.144         | 1.189         | 0.156         | 0.314   | 1.491  | 0.592         | 4.101           | 0.592            | 0.821     | 0.197     | 0.429    | 0.009  |
| 83  | 5.903 | 0.276  | 0.637         | 1.995         | 1.120         | 0.136         | 0.290   | 1.391  | 0.560         | 3.829           | 0.560            | 0.760     | 0.189     | 0.418    | 0.004  |
| 84  | 5.845 | 0.250  | 0.599         | 2.037         | 1.102         | 0.136         | 0.285   | 1.378  | 0.508         | 3.880           | 0.508            | 0.734     | 0.176     | 0.391    | 0.006  |

| No. | Total | Europe | North America | South America | Southern Asia | Northern Asia | Oceania | Africa | Boreal Forest | Tropical Forest | Temperate Forest | Shrubland | Grassland | Cropland | Tundra |
|-----|-------|--------|---------------|---------------|---------------|---------------|---------|--------|---------------|-----------------|------------------|-----------|-----------|----------|--------|
| 85  | 6.217 | 0.300  | 0.683         | 2.075         | 1.162         | 0.158         | 0.309   | 1.469  | 0.622         | 3.986           | 0.662            | 0.827     | 0.195     | 0.408    | 0.010  |
| 86  | 6.938 | 0.312  | 0.729         | 2.371         | 1.307         | 0.173         | 0.346   | 1.633  | 0.627         | 4.525           | 0.627            | 0.894     | 0.215     | 0.471    | 0.013  |
| 87  | 5.874 | 0.276  | 0.631         | 1.981         | 1.093         | 0.154         | 0.294   | 1.387  | 0.572         | 3.785           | 0.572            | 0.779     | 0.180     | 0.377    | 0.012  |
| 88  | 5.571 | 0.276  | 0.619         | 1.847         | 1.043         | 0.138         | 0.277   | 1.318  | 0.573         | 3.556           | 0.573            | 0.743     | 0.177     | 0.372    | 0.006  |
| 89  | 5.908 | 0.260  | 0.608         | 2.040         | 1.099         | 0.153         | 0.294   | 1.396  | 0.531         | 3.875           | 0.531            | 0.764     | 0.175     | 0.375    | 0.013  |
| 90  | 6.759 | 0.304  | 0.708         | 2.307         | 1.259         | 0.181         | 0.339   | 1.595  | 0.619         | 4.394           | 0.619            | 0.885     | 0.204     | 0.433    | 0.018  |
| 91  | 6.084 | 0.306  | 0.685         | 2.002         | 1.141         | 0.151         | 0.303   | 1.438  | 0.637         | 3.862           | 0.637            | 0.816     | 0.197     | 0.411    | 0.007  |
| 92  | 5.669 | 0.279  | 0.626         | 1.880         | 1.058         | 0.148         | 0.285   | 1.339  | 0.579         | 3.608           | 0.579            | 0.763     | 0.178     | 0.372    | 0.011  |
| 93  | 6.102 | 0.278  | 0.644         | 2.080         | 1.139         | 0.157         | 0.304   | 1.440  | 0.570         | 3.967           | 0.570            | 0.797     | 0.185     | 0.396    | 0.012  |
| 94  | 6.085 | 0.281  | 0.646         | 2.065         | 1.136         | 0.157         | 0.304   | 1.436  | 0.576         | 3.939           | 0.576            | 0.800     | 0.186     | 0.397    | 0.012  |
| 95  | 8.086 | 0.378  | 0.872         | 2.716         | 1.519         | 0.214         | 0.408   | 1.899  | 0.760         | 5.194           | 0.760            | 1.067     | 0.256     | 0.547    | 0.021  |
| 96  | 7.247 | 0.342  | 0.784         | 2.429         | 1.354         | 0.195         | 0.365   | 1.707  | 0.700         | 4.648           | 0.700            | 0.964     | 0.226     | 0.474    | 0.018  |
| 97  | 7.495 | 0.344  | 0.797         | 2.537         | 1.406         | 0.197         | 0.377   | 1.764  | 0.695         | 4.845           | 0.695            | 0.982     | 0.234     | 0.500    | 0.018  |
| 98  | 7.284 | 0.365  | 0.822         | 2.389         | 1.358         | 0.196         | 0.367   | 1.716  | 0.760         | 4.597           | 0.760            | 0.992     | 0.233     | 0.476    | 0.016  |
| 99  | 6.607 | 0.341  | 0.756         | 2.148         | 1.232         | 0.175         | 0.333   | 1.557  | 0.714         | 4.141           | 0.714            | 0.908     | 0.214     | 0.436    | 0.012  |
| 100 | 7.233 | 0.334  | 0.775         | 2.446         | 1.351         | 0.190         | 0.361   | 1.705  | 0.683         | 4.678           | 0.683            | 0.951     | 0.223     | 0.469    | 0.016  |

Table S3 The estimated mean N<sub>2</sub>O emissions and emission rates per unit area at continental- and biome-scale with the uncertainty ranges. 1 kg N ha<sup>-1</sup> yr<sup>-1</sup> = 0.1 g N m<sup>-2</sup> yr<sup>-1</sup>

| Continental-scale                                       | Europe              | North America       | South America       | Southern Asia       | Northern Asia       | Oceania             | Africa               |
|---------------------------------------------------------|---------------------|---------------------|---------------------|---------------------|---------------------|---------------------|----------------------|
| N <sub>2</sub> O emissions (Tg N yr <sup>-1</sup> )     | 0.29<br>(0.21~0.40) | 0.66<br>(0.51~0.89) | 2.09<br>(1.63~2.73) | 1.16<br>(0.90~1.52) | 0.16<br>(0.11~0.26) | 0.31<br>(0.23~0.52) | 1.46<br>(1.13~1.91)  |
| N <sub>2</sub> O emission rate (kg N ha <sup>-1</sup> ) | 0.31<br>(0.23~0.43) | 0.31<br>(0.24~0.42) | 1.23<br>(0.96~1.61) | 0.52<br>(0.40~0.68) | 0.13<br>(0.09~0.22) | 0.41<br>(0.31~0.69) | 0.73<br>(0.56~0.95)  |
| Biome-scale                                             | Boreal Forest       | Tropical Forest     | Temperate Forest    | Shrubland           | Grassland           | Cropland            | Tundra               |
| N <sub>2</sub> O emissions (Tg N yr <sup>-1</sup> )     | 0.17<br>(0.10~0.25) | 4.01<br>(3.12~5.21) | 0.59<br>(0.43~0.82) | 0.82<br>(0.61~1.08) | 0.20<br>(0.15~0.25) | 0.41<br>(0.32~0.55) | 0.01<br>(0.002~0.05) |
| N <sub>2</sub> O emission rate (kg N ha <sup>-1</sup> ) | 0.17<br>(0.11~0.26) | 1.60<br>(1.25~2.09) | 0.37<br>(0.27~0.51) | 0.34<br>(0.26~0.45) | 0.2<br>(0.15~0.26)  | 0.46<br>(0.36~0.61) | –                    |
